# Supplementary material for: Normal development of costal element ossification centers of sacral vertebrae in the fetal spine: a postmortem magnetic resonance imaging study
Source: Springer Nature journal article supplement (doi:10.1007/s00234-018-2147-5), 2019-01-03
Supplement: MOESM4 [file 16372970]

| Relative positions | Functions | | | |
| --- | --- | --- | --- | --- |
| S1 | | S2 | |
| Left | Right | Left | Right |
| Distance A | y = 0.2599 × GA + 0.3781 (R2 = 0.8320, P < 0.0001) | y = 0.2494 × GA + 0.8284 (R2 = 0.7854, P < 0.0001) | y = 0.2000 × GA + 1.2890 (R2 = 0.7444, P < 0.0001) | y = 0.2056 × GA + 1.1510 (R2 = 0.7462, P < 0.0001) |
| Distance B | y = 0.1342 × GA + 0.2327 (R2 = 0.6200, P < 0.0001) | y = 0.1313 × GA + 0.3521 (R2 = 0.6480, P < 0.0001) | y = 0.0762 × GA + 0.8387 (R2 = 0.3614, P = 0.0003) | y = 0.0665 × GA + 1.1320 (R2 = 0.3607, P = 0.0003) |
